# Supplementary material for: Fabrication of a porous ZnRh2O4 photocathode for photoelectrochemical water splitting under visible light irradiation and a significant effect of surface modification by ZnO necking treatment
Source: Royal Society of Chemistry journal article supplement (doi:10.1039/c6ta01567k), 2016-01-01
Supplement: c6ta01567k1.pdf [file c6ta01567k1.pdf]

Electronic Supporting Information (ESI) for

**Fabrication of a porous ZnRh<sub>2</sub>O<sub>4</sub> photocathode for photoelectrochemical water splitting under visible light irradiation and significant effect of surface modification by ZnO necking treatment**

Sunao Kamimura,<sup>1,2</sup> Masanobu Higashi,<sup>3</sup> Ryu Abe,<sup>3</sup> and Teruhisa Ohno<sup>1,2,4\*</sup>

<sup>1</sup>Department of Applied Chemistry, Faculty of Engineering, Kyushu Institute of Technology, 1-1 Sensuicho, Tobata, Kitakyushu 804-8550, Japan

<sup>2</sup> Research Center for Advanced Eco-fitting Technology, Kyushu Institute of Technology, 1-1 Sensuicho, Tobata, Kitakyushu 804-8550, Japan

<sup>3</sup> Graduate School of Engineering, Kyoto University, Katsura, Nishikyo-ku, Kyoto 615-8510, Japan

<sup>4</sup> ACT-C, Japan Science and Technology Agency, 4-1-8 Honcho, Kawaguchi-shi, Saitama 322-0012, Japan

< Contents >

ESI. Fig. S1 XPS spectra of bare ZnRh<sub>2</sub>O<sub>4</sub> and ZnO/ZnRh<sub>2</sub>O<sub>4</sub> electrode.

ESI. Fig. S2 CV curve of bare ZnRh<sub>2</sub>O<sub>4</sub> and ZnO/ZnRh<sub>2</sub>O<sub>4</sub> electrode.

ESI. Fig. S3 XPS spectra of ZnO/ZnRh<sub>2</sub>O<sub>4</sub> electrode before and after PEC reaction.

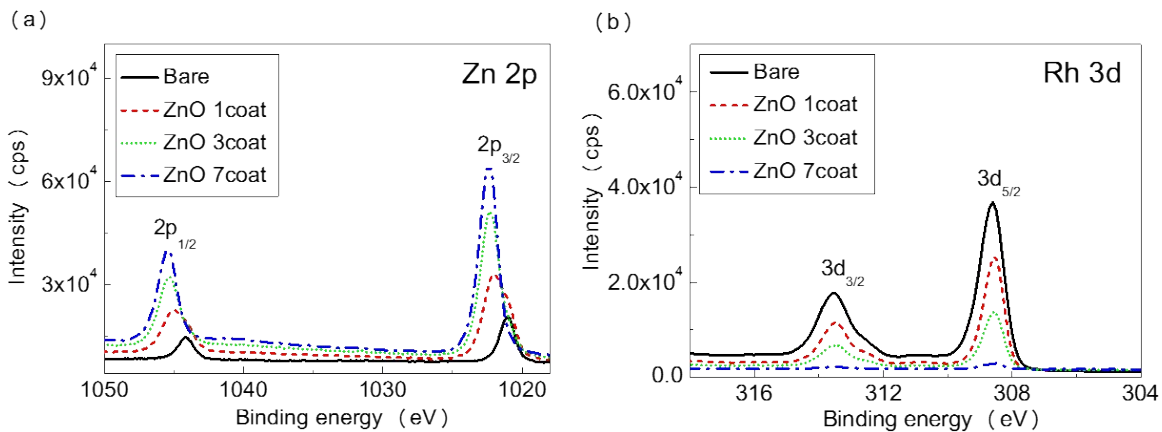

**Figure S1.** XPS spectra of bare  $\text{ZnRh}_2\text{O}_4$  and  $\text{ZnO}/\text{ZnRh}_2\text{O}_4$  electrode.

For the bare  $\text{ZnRh}_2\text{O}_4$  (see **Fig. S1(a)**), major peaks at 1021.0 eV and 1044.1 eV were observed, which peaks were attributed to typical values of Zn  $2p_{3/2}$  and  $2p_{1/2}$  in  $\text{ZnRh}_2\text{O}_4$ , respectively. This our observation was similar to a previous report by Irie *et al.* (refer to *Journal of Materials Chemistry A*, 2016, **4**, 3061 – 3067). These Zn  $2p$  XPS intensities were increased with an increase in the number of drop-casts of ZnO precursor solution, implying that amount of Zn species was increased by necking treatment. It should be noted that peak shift ( $\sim$  ca.1 eV) of the Zn  $2p$  XPS spectrum was observed after necking treatment; major peaks at 1022.4 eV and 1045.5 eV were newly appeared, and these peaks were attributed to typical values of Zn  $2p_{3/2}$  and  $2p_{1/2}$  in ZnO (refer to *Thin Solid Films* 2005, **491**, 153 – 160). In contrast, the Rh  $3d$  XPS intensities were decreased with an increase in the number of drop-casts. These results suggest that ZnO amount at  $\text{ZnO}/\text{ZnRh}_2\text{O}_4$  surface is increased with an increase in the number of drop-casts, which leads to inhibit of X-ray excitation of  $\text{ZnRh}_2\text{O}_4$ , resulting decrease of Rh  $3d$  XPS intensity.

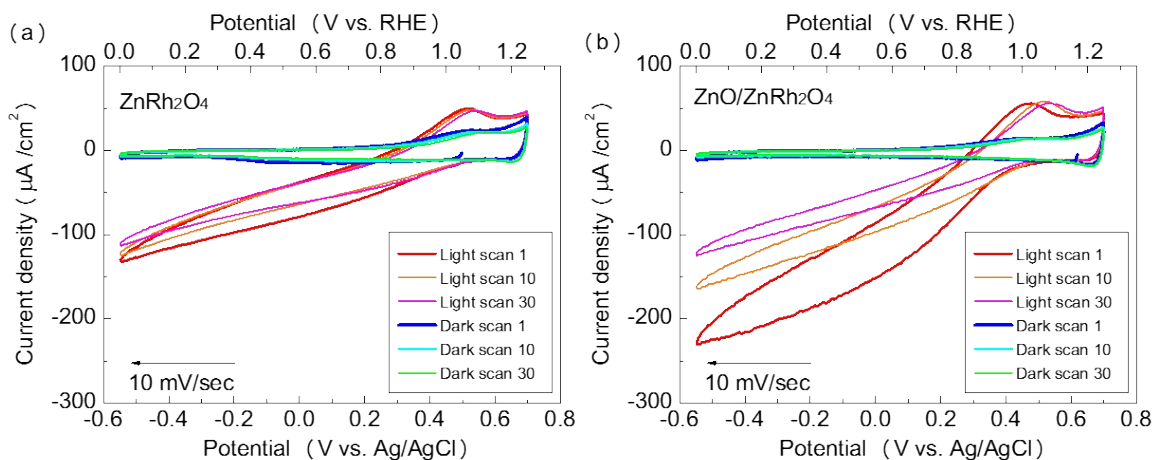

**Figure S2.** Cyclic voltammetry (CV) for bare and ZnO/ZnRh<sub>2</sub>O<sub>4</sub> photocathodes.

The CV curves were measured for bare and ZnO/ZnRh<sub>2</sub>O<sub>4</sub> photocathodes in Ar-purged 0.1 M Na<sub>2</sub>SO<sub>4</sub> solution at potential sweep rate 10 mV/sec. Light source was used Xe-lamp equipped with L-42 cut off filter. The potential first to scan from rest potential to -0.6 V vs. Ag/AgCl at which the scan direction was reversed to +0.7 V vs. Ag/AgCl, and then scan back to the initial potential. It should be noted that the rest potential of bare and ZnO/ZnRh<sub>2</sub>O<sub>4</sub> photocathodes were +0.50 V and +0.62 V vs. Ag/AgCl, respectively. As seen in this figure, the photocurrent response of bare ZnRh<sub>2</sub>O<sub>4</sub> electrode was a relatively stable under PEC reaction. In contrast, the photocurrent of ZnO/ZnRh<sub>2</sub>O<sub>4</sub> photocathode was gradually decreased with a number of cycles. This indicating that durability of ZnO/ZnRh<sub>2</sub>O<sub>4</sub> photocathode is not good.

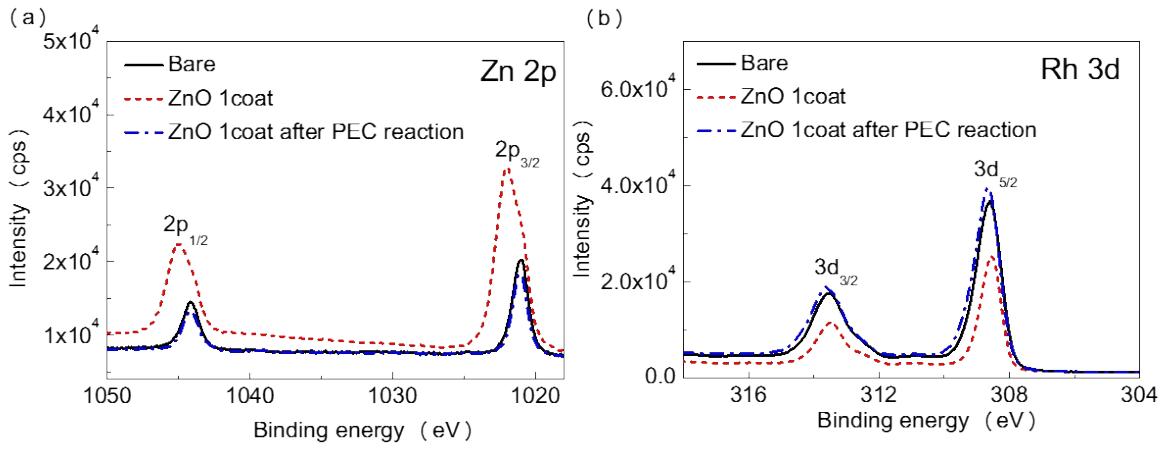

**Figure S3.** XPS spectra of ZnO/ZnRh<sub>2</sub>O<sub>4</sub> electrode before and after PEC reaction.
